# Supplementary material
Source: publisher site journal article supplement (https://www.dovepress.com/article/565865)
Supplement: Supplementary file 1 [file 565865%20Supplementary%20Materials.docx]

# Supplementary Tables and Figures

**Supplementary Table S1** Complete Baseline Characteristics of Study Participants Stratified by Atrial Fibrillation

| Characteristics | Total (n = 463) | non-AF (n = 367) | AF (n = 96) | Statistic | P-value |
| --- | --- | --- | --- | --- | --- |
| Demographics & General Characteristics | | | | | |
| Basic Demographics | | | | | |
| Age, M (Q₁, Q₃) | 67.00 (56.00, 74.00) | 63.00 (54.00, 72.00) | 76.50 (70.00, 81.25) | Z=-8.36 | <0.001 |
| Sex (female), n(%) | 125 (27.00) | 85 (23.16) | 40 (41.67) | χ²=12.3 | <0.001 |
| height (cm), M (Q₁, Q₃) | 167.00 (160.00, 171.00) | 168.00 (160.00, 172.00) | 165.00 (158.00, 170.00) | Z=-2.41 | 0.016 |
| weight (kg), M (Q₁, Q₃) | 67.50 (60.00, 75.00) | 69.00 (60.00, 75.00) | 65.00 (56.00, 70.50) | Z=-2.75 | 0.006 |
| BMI (kg/m²), M (Q₁, Q₃) | 24.44 (22.22, 26.77) | 24.46 (22.49, 26.86) | 24.22 (21.26, 26.26) | Z=-1.39 | 0.166 |
| Clinical Scores | | | | | |
| NIHSS, M (Q₁, Q₃) | 3.00 (1.00, 5.00) | 3.00 (1.00, 4.00) | 4.50 (2.00, 10.00) | Z=-4.73 | <0.001 |
| Admission BI, M (Q₁, Q₃) | 65.00 (37.50, 90.00) | 65.00 (40.00, 90.00) | 47.50 (20.00, 85.00) | Z=-3.59 | <0.001 |
| 90d-mRS, M (Q₁, Q₃) | 2.00 (1.00, 3.00) | 2.00 (1.00, 3.00) | 3.00 (1.00, 4.00) | Z=-4.53 | <0.001 |
| CHA2DS2 VASc, M (Q₁, Q₃) | 2.00 (1.00, 3.00) | 2.00 (1.00, 3.00) | 3.00 (2.00, 4.00) | Z=-6.84 | <0.001 |
| HASBLED, M (Q₁, Q₃) | 2.00 (1.00, 2.00) | 2.00 (1.00, 2.00) | 2.00 (1.75, 3.00) | Z=-3.99 | <0.001 |
| Lifestyle Factors | | | | | |
| Smoking, n(%) | 119 (25.70) | 107 (29.16) | 12 (12.50) | χ²=10.2 | <0.001 |
| Alcohol, n(%) | 86 (18.57) | 78 (21.25) | 8 (8.33) | χ²=7.57 | 0.006 |
| Medical History | | | | | |
| Cardiovascular Diseases | | | | | |
| Ischemic Stroke, n(%) | 98 (21.17) | 70 (19.07) | 28 (29.17) | χ²=4.06 | 0.044 |
| Hemorrhagic Stroke, n(%) | 13 (2.81) | 10 (2.72) | 3 (3.12) | Fisher | 0.738 |
| HTN history, n(%) | 332 (71.71) | 259 (70.57) | 73 (76.04) | χ²=0.87 | 0.351 |
| DM history, n(%) | 137 (29.59) | 110 (29.97) | 27 (28.12) | χ²=0.05 | 0.82 |
| CHD history, n(%) | 29 (6.26) | 16 (4.36) | 13 (13.54) | χ²=9.42 | 0.002 |
| Heart Failure, n(%) | 6 (1.30) | 0 (0.00) | 6 (6.25) | Fisher | <0.001 |
| Dyslipidemia, n(%) | 20 (4.32) | 19 (5.18) | 1 (1.04) | Fisher | 0.092 |
| Atrial Fibrillation Related | | | | | |
| AF history, n(%) | 52 (11.23) | 1 (0.27) | 51 (53.12) | Fisher | <0.001 |
| Anticoagulation, n(%) | 21 (4.54) | 2 (0.54) | 19 (19.79) | Fisher | <0.001 |
| Rate Control, n(%) | 22 (4.75) | 4 (1.09) | 18 (18.75) | Fisher | <0.001 |
| Ablation History, n(%) | 1 (0.22) | 0 (0.00) | 1 (1.04) | Fisher | 0.207 |
| Pacemaker, n(%) | 9 (1.94) | 2 (0.54) | 7 (7.29) | Fisher | <0.001 |
| Acute Treatment & Intervention | | | | | |
| Thrombolysis, n(%) | 110 (23.76) | 74 (20.16) | 36 (37.50) | χ²=11.69 | <0.001 |
| Thrombectomy, n(%) | 7 (1.51) | 4 (1.09) | 3 (3.12) | Fisher | 0.159 |
| Blood Pressure | | | | | |
| SBP, M (Q₁, Q₃) | 156.00 (139.00, 175.25) | 158.00 (142.00, 178.00) | 153.00 (136.75, 170.00) | Z=-1.92 | 0.055 |
| DBP, M (Q₁, Q₃) | 87.00 (78.00, 98.50) | 87.00 (78.00, 99.00) | 87.00 (78.00, 96.50) | Z=-0.22 | 0.827 |
| Laboratory & Biochemical Indicators (on Admission) | | | | | |
| Liver Function | | | | | |
| ALT, M (Q₁, Q₃) | 16.00 (11.80, 23.00) | 16.20 (12.00, 23.45) | 15.90 (11.38, 20.12) | Z=-1.54 | 0.124 |
| AST, M (Q₁, Q₃) | 18.00 (14.00, 24.00) | 17.00 (13.85, 22.35) | 22.00 (17.15, 27.52) | Z=-4.85 | <0.001 |
| Total Protein, M (Q₁, Q₃) | 75.50 (71.15, 80.35) | 75.80 (71.45, 80.80) | 73.65 (70.40, 78.70) | Z=-2.32 | 0.02 |
| Albumin, M (Q₁, Q₃) | 43.90 (41.40, 46.30) | 44.40 (41.55, 46.50) | 42.55 (40.88, 44.42) | Z=-3.90 | <0.001 |
| TB, M (Q₁, Q₃) | 13.50 (10.20, 17.90) | 13.00 (9.90, 17.35) | 16.15 (12.47, 22.70) | Z=-4.45 | <0.001 |
| DBIL, M (Q₁, Q₃) | 4.30 (3.00, 6.20) | 4.10 (2.90, 5.70) | 5.90 (3.90, 7.90) | Z=-5.17 | <0.001 |
| IBIL, M (Q₁, Q₃) | 9.20 (6.80, 12.20) | 8.90 (6.70, 11.65) | 10.40 (8.28, 14.43) | Z=-3.56 | <0.001 |
| Hematology | | | | | |
| WBC, M (Q₁, Q₃) | 6.89 (5.56, 8.49) | 6.87 (5.61, 8.38) | 7.14 (5.49, 9.64) | Z=-1.21 | 0.225 |
| Lymphocyte, M (Q₁, Q₃) | 1.57 (1.21, 2.01) | 1.62 (1.31, 2.04) | 1.31 (1.02, 1.63) | Z=-4.80 | <0.001 |
| Monocyte, M (Q₁, Q₃) | 0.54 (0.43, 0.67) | 0.54 (0.43, 0.66) | 0.55 (0.44, 0.72) | Z=-0.98 | 0.327 |
| Neutrophil, M (Q₁, Q₃) | 4.37 (3.36, 5.92) | 4.29 (3.34, 5.66) | 4.78 (3.44, 7.14) | Z=-1.90 | 0.058 |
| RBC, M (Q₁, Q₃) | 4.49 (4.05, 4.88) | 4.56 (4.17, 4.92) | 4.20 (3.88, 4.64) | Z=-4.20 | <0.001 |
| Hemoglobin, M (Q₁, Q₃) | 138.00 (124.00, 148.00) | 139.00 (126.00, 149.00) | 130.00 (117.00, 143.25) | Z=-3.28 | 0.001 |
| Platelet, M (Q₁, Q₃) | 198.00 (162.50, 236.00) | 204.00 (167.00, 242.50) | 179.50 (145.75, 219.00) | Z=-3.75 | <0.001 |
| Lipid & Vascular Risk Indicators | | | | | |
| TG, M (Q₁, Q₃) | 4.08 (3.45, 4.96) | 4.19 (3.55, 5.03) | 3.87 (3.15, 4.64) | Z=-2.98 | 0.003 |
| TC, M (Q₁, Q₃) | 1.34 (1.03, 1.75) | 1.42 (1.06, 1.79) | 1.14 (0.90, 1.46) | Z=-3.74 | <0.001 |
| HDL C, M (Q₁, Q₃) | 0.98 (0.84, 1.14) | 0.96 (0.84, 1.12) | 1.04 (0.91, 1.18) | Z=-2.24 | 0.025 |
| LDL C, M (Q₁, Q₃) | 2.39 (1.89, 3.09) | 2.43 (1.97, 3.15) | 2.10 (1.62, 2.83) | Z=-3.46 | <0.001 |
| Hcy, M (Q₁, Q₃) | 11.56 (9.40, 14.60) | 11.53 (9.41, 14.79) | 11.58 (9.38, 14.45) | Z=-0.23 | 0.819 |
| Inflammation & Immune Markers | | | | | |
| hsCRP, M (Q₁, Q₃) | 3.50 (1.33, 9.74) | 2.99 (1.24, 8.54) | 5.79 (2.42, 14.66) | Z=-3.93 | <0.001 |
| PLR, M (Q₁, Q₃) | 127.20 (95.59, 163.89) | 125.81 (94.67, 160.80) | 138.46 (97.18, 183.53) | Z=-1.68 | 0.092 |
| NLR, M (Q₁, Q₃) | 2.64 (1.85, 4.14) | 2.55 (1.79, 3.82) | 3.45 (2.21, 6.27) | Z=-4.13 | <0.001 |
| LMR, M (Q₁, Q₃) | 3.00 (2.14, 4.07) | 3.18 (2.29, 4.16) | 2.47 (1.56, 3.46) | Z=-4.32 | <0.001 |
| SII, M (Q₁, Q₃) | 524.95 (364.26, 862.42) | 512.66 (366.22, 805.45) | 615.46 (362.20, 1060.81) | Z=-2.02 | 0.043 |
| SIRI, M (Q₁, Q₃) | 1.46 (0.94, 2.64) | 1.38 (0.92, 2.54) | 1.83 (1.11, 3.84) | Z=-3.03 | 0.002 |
| PIV, M (Q₁, Q₃) | 303.27 (179.95, 508.36) | 302.01 (183.90, 486.99) | 332.75 (177.35, 611.52) | Z=-1.25 | 0.21 |
| CRP, M (Q₁, Q₃) | 1.99 (0.76, 4.21) | 1.92 (0.74, 3.91) | 2.47 (0.97, 5.99) | Z=-2.40 | 0.016 |
| NTR, M (Q₁, Q₃) | 3.11 (2.07, 4.76) | 2.87 (1.96, 4.40) | 3.95 (2.64, 5.99) | Z=-4.48 | <0.001 |
| HLR, M (Q₁, Q₃) | 0.61 (0.46, 0.87) | 0.58 (0.44, 0.81) | 0.78 (0.56, 1.06) | Z=-4.77 | <0.001 |
| LHR, M (Q₁, Q₃) | 1.53 (1.10, 2.13) | 1.63 (1.13, 2.20) | 1.28 (0.95, 1.81) | Z=3.16 | 0.002 |
| Cardiac Biomarkers | | | | | |
| hsTnT, M (Q₁, Q₃) | 10.13 (6.98, 15.59) | 9.44 (6.73, 14.53) | 13.08 (9.57, 17.57) | Z=-4.61 | <0.001 |
| Myoglobin, M (Q₁, Q₃) | 36.40 (27.06, 55.28) | 35.76 (25.89, 53.78) | 39.43 (30.42, 61.87) | Z=-2.29 | 0.022 |
| NT-proBNP, M (Q₁, Q₃) | 80.27 (39.99, 299.20) | 60.70 (32.84, 128.40) | 991.50 (520.70, 1805.25) | Z=-12.54 | <0.001 |
| CK MB, M (Q₁, Q₃) | 1.75 (1.23, 2.56) | 1.72 (1.21, 2.45) | 1.98 (1.35, 3.01) | Z=-2.17 | 0.03 |
| Coagulation Function | | | | | |
| PT, M (Q₁, Q₃) | 13.20 (12.70, 13.70) | 13.10 (12.70, 13.50) | 13.90 (13.28, 14.60) | Z=-8.24 | <0.001 |
| INR, M (Q₁, Q₃) | 1.03 (0.98, 1.08) | 1.02 (0.97, 1.05) | 1.09 (1.03, 1.16) | Z=-7.87 | <0.001 |
| Aptt, M (Q₁, Q₃) | 33.30 (30.90, 36.00) | 33.00 (30.70, 35.50) | 34.05 (31.60, 37.00) | Z=-2.53 | 0.011 |
| Fibrinogen, M (Q₁, Q₃) | 3.33 (2.89, 3.96) | 3.32 (2.90, 3.92) | 3.41 (2.84, 4.00) | Z=-0.33 | 0.743 |
| Antithrombin III, M (Q₁, Q₃) | 98.00 (89.00, 108.00) | 99.00 (92.00, 109.50) | 89.50 (84.00, 97.25) | Z=-6.81 | <0.001 |
| D dimer, M (Q₁, Q₃) | 0.27 (0.22, 0.67) | 0.24 (0.22, 0.44) | 0.60 (0.28, 1.23) | Z=-6.39 | <0.001 |
| FDP, M (Q₁, Q₃) | 1.59 (1.10, 2.50) | 1.48 (1.02, 2.22) | 2.17 (1.47, 3.98) | Z=-4.59 | <0.001 |
| Renal Function & Glucose Metabolism | | | | | |
| BUN, M (Q₁, Q₃) | 5.93 (4.83, 7.03) | 5.90 (4.76, 6.94) | 6.39 (4.93, 7.48) | Z=-1.92 | 0.055 |
| Cr, M (Q₁, Q₃) | 69.00 (58.00, 85.50) | 70.00 (57.00, 84.50) | 68.00 (61.00, 89.25) | Z=-1.00 | 0.315 |
| FBG, M (Q₁, Q₃) | 5.59 (4.91, 6.70) | 5.59 (4.91, 6.70) | 5.57 (4.91, 6.92) | Z=-0.22 | 0.825 |
| HbA1c, M (Q₁, Q₃) | 6.00 (5.56, 7.00) | 6.00 (5.56, 7.00) | 6.00 (5.58, 6.62) | Z=-0.17 | 0.866 |
| RBG, M (Q₁, Q₃) | 7.40 (6.22, 9.56) | 7.43 (6.14, 9.61) | 7.36 (6.37, 9.43) | Z=-0.10 | 0.923 |

**Notes:** Baseline characteristics of all enrolled participants, stratified by atrial fibrillation status. Continuous variables are presented as median (Q₁, Q₃) and categorical variables as number (%). Group comparisons were performed using the Mann–Whitney U test for continuous variables (reported as Z), and Chi-square or Fisher’s exact test for categorical variables, as appropriate.

**Abbreviations:** AF, atrial fibrillation; BMI, body mass index; HTN-history, history of hypertension; DM-history, history of diabetes mellitus; NIHSS, National Institutes of Health Stroke Scale; hsCRP, high-sensitivity C-reactive protein; NLR, neutrophil-to-lymphocyte ratio; SIRI, systemic inflammation response index; NTR, neutrophil-to-total cholesterol ratio; HLR, high-density lipoprotein-to-lymphocyte ratio; NT-proBNP, N-terminal pro-B-type natriuretic peptide; hsTnT, high-sensitivity troponin T; WBC, white blood cell count; CRP, C-reactive protein; LHR, lymphocyte-to-high-density lipoprotein cholesterol ratio; SII, systemic immune-inflammation index; LMR, lymphocyte-to-monocyte ratio; PIV, pan-immune-inflammation value; CHD, coronary heart disease; HF, heart failure; TB, total bilirubin; DBIL, direct bilirubin; IBIL, indirect bilirubin; ALT, alanine aminotransferase; AST, aspartate aminotransferase; FBG, fasting blood glucose; TG, triglyceride; TC, total cholesterol; HDL-C, high-density lipoprotein cholesterol; LDL-C, low-density lipoprotein cholesterol; Hcy, homocysteine; HbA1c, glycated hemoglobin; RBC, red blood cell count; RBG, random blood glucose; BUN, blood urea nitrogen; Cr, creatinine; SBP, systolic blood pressure; DBP, diastolic blood pressure; CK-MB, creatine kinase-MB; PT, prothrombin time; INR, international normalized ratio; aPTT, activated partial thromboplastin time; FDP, fibrinogen degradation product.

**Supplementary Table S2** Full univariate logistic regression results of all variables associated with poor functional outcome at 90 days

| Variables | β | S.E | Z | P | OR (95%CI) |
| --- | --- | --- | --- | --- | --- |
| Demographics & General Characteristics | | | | | |
| Basic Demographics | | | | | |
| AF | 1.33 | 0.24 | 5.56 | <0.001 | 3.77 (2.37 ~ 6.07) |
| Sex (female) | 0.36 | 0.21 | 1.66 | 0.097 | 1.43 (0.94 ~ 2.17) |
| age | 0.63 | 0.11 | 5.64 | <0.001 | 1.88 (1.52 ~ 2.36) |
| height (cm) | -0.13 | 0.1 | -1.29 | 0.195 | 0.88 (0.73 ~ 1.07) |
| weight (kg) | -0.32 | 0.1 | -3.07 | 0.002 | 0.73 (0.59 ~ 0.89) |
| BMI (kg/m²) | -0.3 | 0.1 | -2.9 | 0.004 | 0.74 (0.6 ~ 0.9) |
| Clinical Scores | | | | | |
| admission-BI | -1.18 | 0.12 | -9.51 | <0.001 | 0.31 (0.24 ~ 0.39) |
| NIHSS | 0.88 | 0.12 | 7.52 | <0.001 | 2.41 (1.93 ~ 3.06) |
| CHA2DS2-VASc | 0.49 | 0.1 | 4.84 | <0.001 | 1.64 (1.35 ~ 2.01) |
| HASBLED | 0.31 | 0.1 | 3.13 | 0.002 | 1.37 (1.13 ~ 1.67) |
| Lifestyle Factors | | | | | |
| smoking-history | -0.3 | 0.1 | -2.89 | 0.004 | 0.74 (0.6 ~ 0.9) |
| alcohol-history | -0.27 | 0.11 | -2.51 | 0.012 | 0.77 (0.62 ~ 0.94) |
| Medical History | | | | | |
| Cardiovascular Diseases | | | | | |
| ischemic-stroke | 0.24 | 0.23 | 1.05 | 0.294 | 1.28 (0.81 ~ 2.01) |
| hemorrhagic-stroke | 0.74 | 0.56 | 1.31 | 0.191 | 2.09 (0.68 ~ 6.61) |
| HTN-history | 0.21 | 0.22 | 0.97 | 0.331 | 1.24 (0.81 ~ 1.91) |
| DM-history | 0.1 | 0.21 | 0.48 | 0.628 | 1.11 (0.73 ~ 1.67) |
| CHD | 0.08 | 0.4 | 0.19 | 0.849 | 1.08 (0.48 ~ 2.31) |
| HF | 0.57 | 0.82 | 0.69 | 0.488 | 1.77 (0.32 ~ 9.66) |
| dyslipidemia | -0.3 | 0.5 | -0.6 | 0.551 | 0.74 (0.26 ~ 1.89) |
| Atrial Fibrillation Related | | | | | |
| AF-history | 0.99 | 0.3 | 3.31 | <0.001 | 2.7 (1.51 ~ 4.9) |
| anticoagulation | 1.1 | 0.46 | 2.39 | 0.017 | 3.01 (1.24 ~ 7.75) |
| rate-control | 0.98 | 0.44 | 2.2 | 0.028 | 2.67 (1.12 ~ 6.59) |
| pacemaker | 0.05 | 0.09 | 0.51 | 0.609 | 1.05 (0.86 ~ 1.26) |
| Acute Treatment & Intervention | | | | | |
| thrombolysis | 0.41 | 0.22 | 1.83 | 0.067 | 1.5 (0.97 ~ 2.32) |
| thrombectomy | 1.5 | 0.84 | 1.78 | 0.074 | 4.49 (0.96 ~ 31.62) |
| Blood Pressure | | | | | |
| SBP | -0.16 | 0.1 | -1.64 | 0.101 | 0.85 (0.7 ~ 1.03) |
| DBP | -0.03 | 0.1 | -0.35 | 0.725 | 0.97 (0.8 ~ 1.17) |
| Laboratory & Biochemical Indicators (on Admission) | | | | | |
| Liver Function | | | | | |
| ALT | -0.09 | 0.1 | -0.9 | 0.369 | 0.92 (0.75 ~ 1.11) |
| AST | 0.4 | 0.1 | 3.95 | <0.001 | 1.5 (1.23 ~ 1.83) |
| total-protein | 0.02 | 0.1 | 0.23 | 0.82 | 1.02 (0.85 ~ 1.24) |
| Albumin | -0.3 | 0.16 | -1.87 | 0.061 | 0.74 (0.53 ~ 0.97) |
| TB | 0.64 | 0.11 | 5.9 | <0.001 | 1.9 (1.54 ~ 2.36) |
| DBIL | 0.72 | 0.11 | 6.49 | <0.001 | 2.05 (1.66 ~ 2.57) |
| IBIL | 0.54 | 0.11 | 5.17 | <0.001 | 1.72 (1.41 ~ 2.13) |
| Hematology | | | | | |
| WBC | 0.41 | 0.11 | 3.82 | <0.001 | 1.51 (1.23 ~ 1.87) |
| lymphocyte | -0.56 | 0.11 | -4.97 | <0.001 | 0.57 (0.46 ~ 0.71) |
| monocyte | 0.12 | 0.1 | 1.21 | 0.226 | 1.13 (0.93 ~ 1.38) |
| neutrophil | 0.59 | 0.11 | 5.37 | <0.001 | 1.8 (1.46 ~ 2.23) |
| RBC | -0.07 | 0.11 | -0.68 | 0.495 | 0.93 (0.74 ~ 1.13) |
| hemoglobin | -0.34 | 0.1 | -3.34 | <0.001 | 0.71 (0.58 ~ 0.86) |
| platelet | -0.3 | 0.1 | -2.88 | 0.004 | 0.74 (0.6 ~ 0.91) |
| Lipid & Vascular Risk Indicators | | | | | |
| TG | -0.09 | 0.1 | -0.94 | 0.348 | 0.91 (0.75 ~ 1.1) |
| TC | -0.2 | 0.1 | -1.94 | 0.053 | 0.82 (0.66 ~ 1) |
| HDL-C | -0.03 | 0.1 | -0.31 | 0.758 | 0.97 (0.8 ~ 1.17) |
| LDL-C | -0.1 | 0.1 | -1.02 | 0.306 | 0.9 (0.75 ~ 1.09) |
| Hcy | 0.23 | 0.1 | 2.36 | 0.018 | 1.25 (1.04 ~ 1.52) |
| Inflammation & Immune Markers | | | | | |
| hsCRP | 0.63 | 0.1 | 6.29 | <0.001 | 1.87 (1.54 ~ 2.29) |
| PLR | 0.24 | 0.1 | 2.37 | 0.018 | 1.27 (1.04 ~ 1.54) |
| NLR | 0.77 | 0.12 | 6.64 | <0.001 | 2.17 (1.74 ~ 2.75) |
| LMR | -0.55 | 0.11 | -5.07 | <0.001 | 0.58 (0.47 ~ 0.71) |
| SII | 0.57 | 0.11 | 4.98 | <0.001 | 1.76 (1.42 ~ 2.21) |
| SIRI | 0.69 | 0.11 | 5.97 | <0.001 | 1.99 (1.6 ~ 2.51) |
| PIV | 0.54 | 0.11 | 4.73 | <0.001 | 1.72 (1.38 ~ 2.16) |
| CRP | 0.27 | 0.1 | 2.8 | 0.005 | 1.31 (1.09 ~ 1.59) |
| NTR | 0.62 | 0.11 | 5.39 | <0.001 | 1.85 (1.49 ~ 2.34) |
| HLR | 0.44 | 0.1 | 4.32 | <0.001 | 1.55 (1.27 ~ 1.89) |
| Cardiac Biomarkers | | | | | |
| hsTnT | 0.3 | 0.1 | 3.01 | 0.003 | 1.35 (1.11 ~ 1.65) |
| myoglobin | 0.42 | 0.11 | 3.93 | <0.001 | 1.53 (1.25 ~ 1.91) |
| NT-proBNP | 0.46 | 0.1 | 4.59 | <0.001 | 1.58 (1.3 ~ 1.93) |
| CK-MB | 0.16 | 0.1 | 1.62 | 0.106 | 1.17 (0.97 ~ 1.42) |
| Coagulation Function | | | | | |
| PT | 0.89 | 0.26 | 3.37 | <0.001 | 2.44 (1.5 ~ 4.23) |
| INR | 0.09 | 0.1 | 0.87 | 0.386 | 1.09 (0.9 ~ 1.43) |
| aPTT | -0.03 | 0.1 | -0.3 | 0.761 | 0.97 (0.78 ~ 1.18) |
| fibrinogen | 0.09 | 0.1 | 0.91 | 0.362 | 1.09 (0.9 ~ 1.32) |
| antithrombin-III | -0.09 | 0.1 | -0.98 | 0.328 | 0.91 (0.74 ~ 1.1) |
| D-dimer | 0.35 | 0.11 | 3.19 | 0.001 | 1.42 (1.16 ~ 1.78) |
| FDP | 0.38 | 0.1 | 3.71 | <0.001 | 1.46 (1.2 ~ 1.8) |
| Renal Function & Glucose Metabolism | | | | | |
| BUN | 0.01 | 0.1 | 0.14 | 0.89 | 1.01 (0.84 ~ 1.22) |
| Cr | -0.07 | 0.1 | -0.71 | 0.48 | 0.93 (0.77 ~ 1.13) |
| FBG | 0.28 | 0.1 | 2.94 | 0.003 | 1.33 (1.1 ~ 1.61) |
| HbA1c | -0.03 | 0.1 | -0.28 | 0.78 | 0.97 (0.79 ~ 1.17) |
| RBG | 0.17 | 0.1 | 1.74 | 0.081 | 1.18 (0.98 ~ 1.43) |

**Notes: Univariate logistic regression analysis examining associations between baseline variables and poor functional outcome at 90 days. Results are presented as regression coefficient (β), standard error (SE), Z statistic, P-value, and odds ratio (OR) with 95% confidence interval.**

**Abbreviations: AF, atrial fibrillation; age, age in years; height, height in cm; weight, weight in kg; BMI, body mass index; admission-BI, Barthel Index on admission; NIHSS, National Institutes of Health Stroke Scale; CHA2DS2-VASc, stroke risk score for atrial fibrillation; HASBLED, bleeding risk score for atrial fibrillation; smoking-history, history of smoking; alcohol-history, history of alcohol consumption; ischemic-stroke, history of ischemic stroke; hemorrhagic-stroke, history of hemorrhagic stroke; HTN-history, history of hypertension; DM-history, history of diabetes mellitus; CHD, coronary heart disease; HF, heart failure; dyslipidemia, abnormal lipid profile; AF-history, prior atrial fibrillation; anticoagulation, use of anticoagulants; rate-control, rate control therapy; pacemaker, presence of pacemaker; thrombolysis, intravenous thrombolytic therapy; thrombectomy, mechanical thrombectomy; SBP, systolic blood pressure; DBP, diastolic blood pressure; ALT, alanine aminotransferase; AST, aspartate aminotransferase; total-protein, total protein; Albumin, serum albumin; TB, total bilirubin; DBIL, direct bilirubin; IBIL, indirect bilirubin; WBC, white blood cell count; lymphocyte, lymphocyte count; monocyte, monocyte count; neutrophil, neutrophil count; RBC, red blood cell count; hemoglobin, hemoglobin concentration; platelet, platelet count; TG, triglyceride; TC, total cholesterol; HDL-C, high-density lipoprotein cholesterol; LDL-C, low-density lipoprotein cholesterol; Hcy, homocysteine; hsCRP, high-sensitivity C-reactive protein;** **PLR, platelet-to-lymphocyte ratio; NLR, neutrophil-to-lymphocyte ratio; LMR, lymphocyte-to-monocyte ratio; SII, systemic immune-inflammation index; SIRI, systemic inflammation response index; PIV, pan-immune-inflammation value; CRP, C-reactive protein;** **NTR, neutrophil-to-total cholesterol ratio; HLR, high-density lipoprotein-to-lymphocyte ratio; hsTnT, high-sensitivity troponin T; myoglobin, serum myoglobin; NT-proBNP, N-terminal pro–B-type natriuretic peptide; CK-MB, creatine kinase-MB; PT, prothrombin time; INR, international normalized ratio; aPTT, activated partial thromboplastin time; fibrinogen, plasma fibrinogen; antithrombin-III, antithrombin III activity; D-dimer, D-dimer; FDP, fibrinogen degradation products; BUN, blood urea nitrogen; Cr, serum creatinine; FBG, fasting blood glucose; HbA1c, glycated hemoglobin; RBG, random blood glucose.**

**Supplementary Table S3** **Classification of Variables Used in Statistical Analyses**

| Categories | Variable |
| --- | --- |
| Must-Have Confounders | age, Sex (female),BMI,HTN-history, DM-history, NIHSS |
| Core Variable of Interest | AF |
| Candidate Mediators | hsCRP, NLR, SIRI, NTR, HLR, NT-proBNP, hsTnT, myoglobin,WBC, lymphocyte, neutrophil, hemoglobin, LHR, SII, LMR, PIV |
| Other Associated Variables | thrombolysis, low-dose, thrombectomy, ischemic-stroke, hemorrhagic-stroke, CHD, HF, smoking-history, alcohol-history, dyslipidemia, AF-history, anticoagulation, rate-control, ablation-history, pacemaker, height, weight,TB, DBIL, IBIL, ALT, AST, FBG, TG, TC, HDL-C, LDL-C, Hcy, HbA1c, monocyte, platelet, RBC, RBG, BUN, Cr, total-protein, Albumin, SBP, DBP, CK-MB, PT, INR, aPTT, fibrinogen, antithrombin-III, D-dimer, FDP |

**Notes: This table summarizes the classification of variables included in the statistical analyses. Must-have confounders were predefined based on clinical relevance and included in all adjusted models. The core variable of interest (AF) served as the primary exposure. Candidate mediators consist of inflammatory and cardiac biomarkers considered for Bayesian mediation analysis. Other associated variables were included as a secondary pool for LASSO-based selection to identify additional predictors of 90-day poor functional outcome.**

**Abbreviations: AF, atrial fibrillation; BMI, body mass index; HTN-history, history of hypertension; DM-history, history of diabetes mellitus; NIHSS, National Institutes of Health Stroke Scale; hsCRP, high-sensitivity C-reactive protein; NLR, neutrophil-to-lymphocyte ratio; SIRI, systemic inflammation response index; NTR, neutrophil-to-total cholesterol ratio; HLR, high-density lipoprotein-to-lymphocyte ratio; NT-proBNP, N-terminal pro–B-type natriuretic peptide; hsTnT, high-sensitivity troponin T; WBC, white blood cell count; LHR, lymphocyte-to-high-density lipoprotein cholesterol ratio; SII, systemic immune-inflammation index; LMR, lymphocyte-to-monocyte ratio; PIV, pan-immune-inflammation value; CHD, coronary heart disease; HF, heart failure; TB, total bilirubin; DBIL, direct bilirubin; IBIL, indirect bilirubin; ALT, alanine aminotransferase; AST, aspartate aminotransferase; FBG, fasting blood glucose; TG, triglyceride; TC, total cholesterol; HDL-C, high-density lipoprotein cholesterol; LDL-C, low-density lipoprotein cholesterol; Hcy, homocysteine; HbA1c, hemoglobin A1c; RBC, red blood cell count; RBG, random blood glucose; BUN, blood urea nitrogen; Cr, creatinine; SBP, systolic blood pressure; DBP, diastolic blood pressure; CK-MB, creatine kinase-MB; PT, prothrombin time; INR, international normalized ratio; aPTT, activated partial thromboplastin time; FDP, fibrinogen degradation products.**

**Supplementary Table S4** LASSO Regression Coefficients of Candidate Mediators (Layer 1)

| Variable | Coefficient | Category |
| --- | --- | --- |
| age | 0.429 | Must-Have Confounders |
| Sex (female) | -0.112 | Must-Have Confounders |
| BMI (kg/m²) | -0.201 | Must-Have Confounders |
| HTN-history | 0.006 | Must-Have Confounders |
| DM-history | 0.056 | Must-Have Confounders |
| NIHSS | 0.688 | Must-Have Confounders |
| hsCRP | 0.156 | Candidate Mediators |
| NLR | 0.208 | Candidate Mediators |
| SIRI | 0.137 | Candidate Mediators |
| NTR | 0.003 | Candidate Mediators |
| HLR | 0.000 | Candidate Mediators |
| NT-proBNP | 0.000 | Candidate Mediators |
| hsTnT | 0.000 | Candidate Mediators |
| myoglobin | 0.088 | Candidate Mediators |
| WBC | 0 | Candidate Mediators |
| lymphocyte | 0 | Candidate Mediators |
| neutrophil | 0 | Candidate Mediators |
| hemoglobin | 0 | Candidate Mediators |
| CRP | 0 | Candidate Mediators |
| LHR | 0 | Candidate Mediators |
| SII | 0 | Candidate Mediators |
| LMR | 0 | Candidate Mediators |
| PIV | 0 | Candidate Mediators |

**Supplementary Table S5** LASSO Regression Coefficients of Other Associated Variables (Layer 2)

| Variable | Coefficient | Category |
| --- | --- | --- |
| age | 0.452852977 | Must-Have Confounders |
| Sex (female) | -0.05727593 | Must-Have Confounders |
| BMI (kg/m²) | -0.261408935 | Must-Have Confounders |
| HTN-history | 0.005873699 | Must-Have Confounders |
| DM-history | -0.010068286 | Must-Have Confounders |
| NIHSS | 0.755961358 | Must-Have Confounders |
| weight (kg) | 0 | Other Associated Variables |
| thrombolysis | 0 | Other Associated Variables |
| low-dose | 0 | Other Associated Variables |
| thrombectomy | 0 | Other Associated Variables |
| ischemic-stroke | 0 | Other Associated Variables |
| hemorrhagic-stroke | 0 | Other Associated Variables |
| CHD | 0 | Other Associated Variables |
| HF | 0 | Other Associated Variables |
| smoking-history | 0 | Other Associated Variables |
| alcohol-history | 0 | Other Associated Variables |
| dyslipidemia | 0 | Other Associated Variables |
| AF-history | 0 | Other Associated Variables |
| anticoagulation | 0 | Other Associated Variables |
| rate-control | 0 | Other Associated Variables |
| ablation-history | 0 | Other Associated Variables |
| pacemaker | 0 | Other Associated Variables |
| height (cm) | 0 | Other Associated Variables |
| TB | 0 | Other Associated Variables |
| DBIL | 0.33797183 | Other Associated Variables |
| IBIL | 0 | Other Associated Variables |
| ALT | 0 | Other Associated Variables |
| AST | 0 | Other Associated Variables |
| FBG | 0.152997768 | Other Associated Variables |
| TG | 0 | Other Associated Variables |
| TC | 0 | Other Associated Variables |
| HDL-C | -0.007301483 | Other Associated Variables |
| LDL-C | 0 | Other Associated Variables |
| Hcy | 0.049450231 | Other Associated Variables |
| HbA1c | 0 | Other Associated Variables |
| monocyte | 0 | Other Associated Variables |
| platelet | 0 | Other Associated Variables |
| RBC | 0 | Other Associated Variables |
| RBG | 0 | Other Associated Variables |
| BUN | 0 | Other Associated Variables |
| Cr | 0 | Other Associated Variables |
| total-protein | 0.066042385 | Other Associated Variables |
| Albumin | 0 | Other Associated Variables |
| SBP | 0 | Other Associated Variables |
| DBP | 0 | Other Associated Variables |
| CK-MB | 0 | Other Associated Variables |
| PT | 0 | Other Associated Variables |
| INR | 0 | Other Associated Variables |
| aPTT | 0 | Other Associated Variables |
| fibrinogen | 0 | Other Associated Variables |
| antithrombin-III | 0 | Other Associated Variables |
| D-dimer | 0 | Other Associated Variables |
| FDP | 0 | Other Associated Variables |

**Notes:** Unified Caption for Supplementary Tables S4–S5: LASSO regression coefficients for candidate mediators (Layer 1, Table S4) and other associated variables (Layer 2, Table S5). Variables with non-zero coefficients were selected as potential predictors in the penalized model.

**Abbreviations (for Tables S4–S5):** *HTN*, hypertension; DM, diabetes mellitus; NIHSS, National Institutes of Health Stroke Scale; BMI, body mass index; hsCRP, high-sensitivity C-reactive protein; NLR, neutrophil-to-lymphocyte ratio; SIRI, systemic inflammation response index; NTR, neutrophil-to-total cholesterol ratio; HLR, high-density lipoprotein-to-lymphocyte ratio; NT-proBNP, N-terminal pro-B-type natriuretic peptide; hsTnT, high-sensitivity troponin T; WBC, white blood cell; CRP, C-reactive protein; LHR, lymphocyte-to-high-density lipoprotein cholesterol ratio; SII, systemic immune-inflammation index; LMR, lymphocyte-to-monocyte ratio; PIV, pan-immune-inflammation value; CHD, coronary heart disease; HF, heart failure; TB, total bilirubin; DBIL, direct bilirubin; IBIL, indirect bilirubin; ALT, alanine aminotransferase; AST, aspartate aminotransferase; FBG, fasting blood glucose; TG, triglyceride; TC, total cholesterol; HDL-C, high-density lipoprotein cholesterol; LDL-C, low-density lipoprotein cholesterol; Hcy, homocysteine; HbA1c, glycated hemoglobin; RBC, red blood cell; RBG, random blood glucose; BUN, blood urea nitrogen; Cr, creatinine; SBP, systolic blood pressure; DBP, diastolic blood pressure; CK-MB, creatine kinase-MB; PT, prothrombin time; INR, international normalized ratio; aPTT, activated partial thromboplastin time; FDP, fibrinogen degradation product.

**Supplementary** **Table S6** **Performance Metrics of Logistic Regression Models in the Entire Cohort**

| Model | AUC | Brier | Cal-Intercept | Cal-Slope |
| --- | --- | --- | --- | --- |
| Confounders | 0.757 | 0.183 | -2.485 | 5.021 |
| FullModel | 0.829 | 0.159 | -2.552 | 5.173 |

**Notes:** Logistic regression model performance for predicting 90-day poor functional outcome (mRS > 2). The Confounders model included age, sex, hypertension, diabetes, and baseline NIHSS. The Full Model additionally incorporated atrial fibrillation and LASSO-selected mediators. Discrimination was assessed using the area under the ROC curve (AUC; higher indicates better separation). Overall accuracy was evaluated using the Brier score (lower indicates better performance). Calibration was described using the calibration intercept (ideal = 0) and calibration slope (ideal = 1), where deviations reflect systematic under-/overprediction or overfitting.

**Abbreviations:** AUC, area under the curve; ROC, receiver operating characteristic

**Supplementary** **Table S7** **Sensitivity Analysis of Mediation Results with E-values for Each Inflammatory Mediator, Excluding Baseline Stroke Severity (NIHSS).**

| Mediator | ACME (95% CI) | ADE (95% CI) | Total (95% CI) | Prop Mediated | ADE E-value | ACME Robustness |
| --- | --- | --- | --- | --- | --- | --- |
| hsCRP | 0.035 (0.008, 0.070) | 0.180 (0.070, 0.295) | 0.219 (0.103, 0.338) | 16.1% | 1.684 | Robust |
| NLR | 0.065 (0.026, 0.109) | 0.153 (0.043, 0.263) | 0.221 (0.105, 0.339) | 29.4% | 1.603 | Robust |
| SIRI | 0.049 (0.015, 0.099) | 0.167 (0.062, 0.284) | 0.221 (0.109, 0.348) | 22.3% | 1.646 | Robust |
| myoglobin | 0.015 (-0.003, 0.045) | 0.200 (0.090, 0.319) | 0.217 (0.103, 0.337) | 7.0% | 1.742 | Robust |

**Notes:** This table presents the results of a sensitivity mediation analysis excluding baseline stroke severity (NIHSS) from the confounder model. For each mediator, the Average Causal Mediation Effect (ACME), Average Direct Effect (ADE), and Total Effect are provided with 95% confidence intervals (CI). The Proportion Mediated indicates the fraction of the total effect mediated through each mediator. The analysis adjusted for age, sex, body mass index (BMI), history of hypertension, and history of diabetes. The E-value quantifies the robustness of the observed effect to potential unmeasured confounding.

**Abbreviations:** ACME: Average Causal Mediation Effect; ADE: Average Direct Effect; Total: Total Effect; Prop_Mediated: Proportion of the Effect Mediated; CI: Confidence Interval.

**Supplementary** **Table S8** Definitions and Calculation Formulas of Inflammatory Indices

| Marker | Full Name | Formula |
| --- | --- | --- |
| PLR | Platelet-to-lymphocyte ratio | PLR = platelet count / lymphocyte count |
| NLR | Neutrophil-to-lymphocyte ratio | NLR = neutrophil count / lymphocyte count |
| LMR | Lymphocyte-to-monocyte ratio | LMR = lymphocyte count / monocyte count |
| SII | Systemic immune-inflammation index | SII = (platelet count × neutrophil count) / lymphocyte count |
| SIRI | Systemic inflammation response index | SIRI = (neutrophil count × monocyte count) / lymphocyte count |
| PIV | Pan-immune-inflammation value | PIV = (platelet count × neutrophil count × monocyte count) / lymphocyte count |
| NTR | Neutrophil-to-total cholesterol ratio | NTR = neutrophil count / total cholesterol count |
| HLR | High-density lipoprotein-to-lymphocyte ratio | HLR = High-density lipoprotein / lymphocyte count |

**Notes:** Formulas are based on standard laboratory measurements from admission blood samples.

# Supplementary Figure


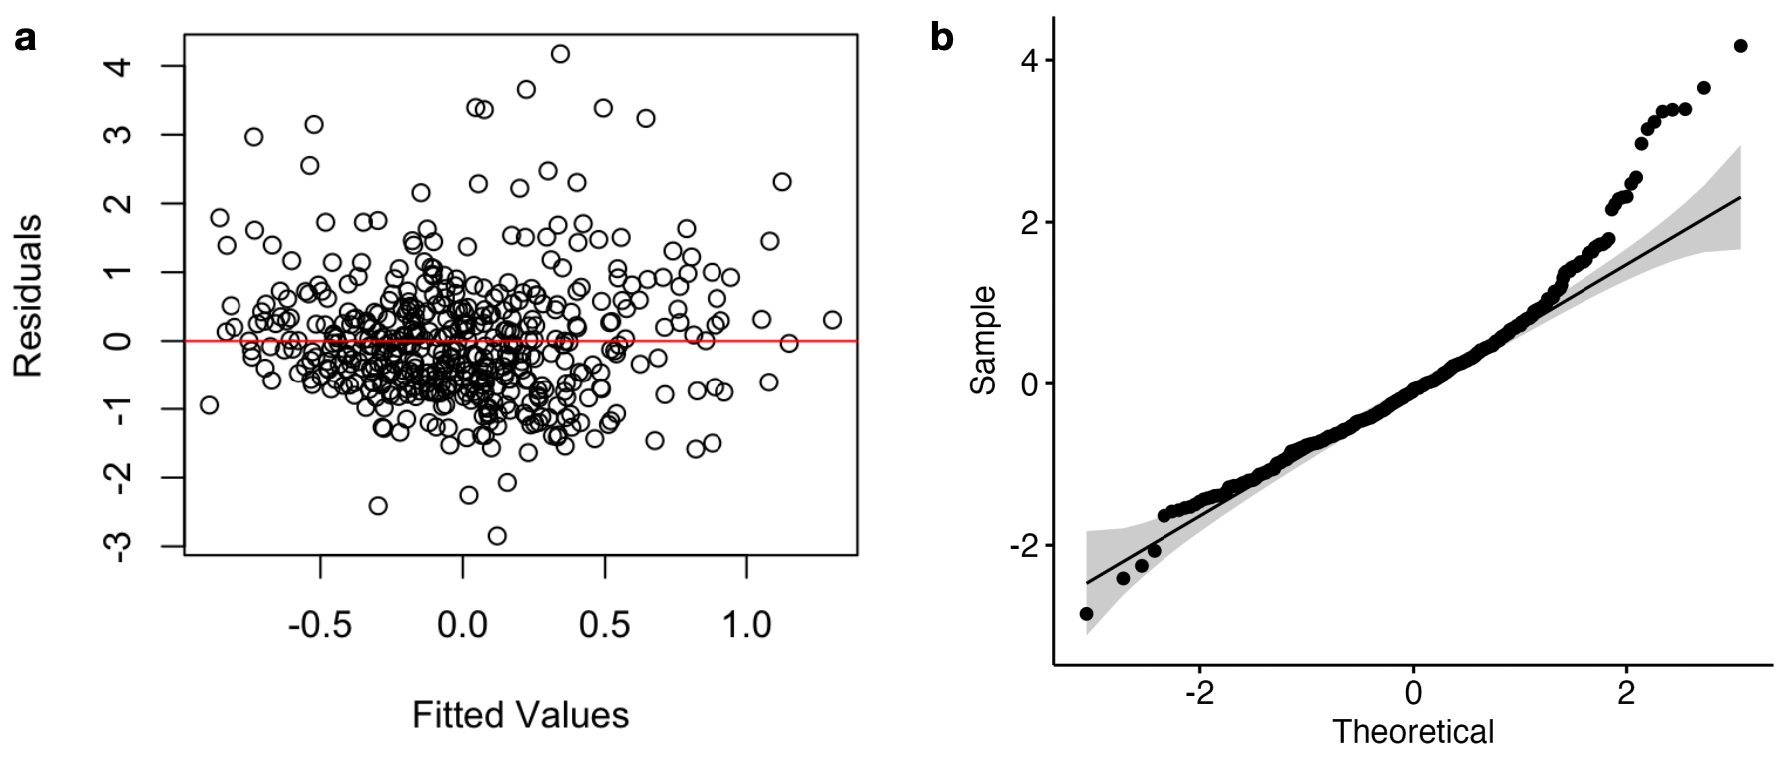


**Supplementary Figure. S1** Diagnostic plots used to assess the key assumptions of the linear mediation models. Residual diagnostics were performed to evaluate the linear regression models for mediators in the causal mediation analysis. (a) Residuals vs. fitted values plot: shows no systematic deviations, supporting the assumption of homoscedasticity. (b) Normal Q–Q plot: indicates approximate normality of residuals. Together, these diagnostics confirm that the linear regression models for each mediator (*NLR, SIRI, hsCRP, myoglobin*) adequately meet model assumptions, supporting the validity of the mediation analysis. **Abbreviations:** *NLR*, neutrophil-to-lymphocyte ratio; *SIRI*, systemic inflammation response index; *hsCRP*, high-sensitivity C-reactive protein.
